# Supplementary material
Source: PubMed Central journal article supplement (PMC2967722)
Supplement: NIHMS233821-supplement-01.pdf [file NIHMS233821-supplement-01.pdf]

**Table 1. Statements in the 2005 American Academy of Ophthalmology primary open angle glaucoma Preferred Practice Pattern translated into clinical questions**

| Statements in the 2005 AAO POAG PPP (ordered as in PPP)*                                                                                                                                                                                                                                                                                                                                                                                                                                                                                                                                                                                                                                                                       | Restated clinical questions and question number                                                                                                                                                                                                                                                                          |
|--------------------------------------------------------------------------------------------------------------------------------------------------------------------------------------------------------------------------------------------------------------------------------------------------------------------------------------------------------------------------------------------------------------------------------------------------------------------------------------------------------------------------------------------------------------------------------------------------------------------------------------------------------------------------------------------------------------------------------|--------------------------------------------------------------------------------------------------------------------------------------------------------------------------------------------------------------------------------------------------------------------------------------------------------------------------|
| <p>"The IOP can be lowered by medical treatment, or by laser, filtering, or cyclodestructive surgery (alone or in combination). The choice of initial therapy depends on numerous considerations, and discussion of treatment with the patient should include appropriate options.<sup>[A:III]</sup></p> <p>In many instances, topical medications constitute effective initial therapy.<sup>56 [A:I]</sup></p>                                                                                                                                                                                                                                                                                                                | <p>1. Is medical therapy an effective initial treatment in lowering IOP in patients with POAG?</p> <p>9. Does discussion of the treatment options for lowering IOP (medical, laser, filtering or cyclodestructive surgery) affect the patient's choice of initial therapy?</p>                                           |
| <p>The prostaglandin analogs and the beta adrenergic antagonists are the most frequently used eye drops for lowering IOP in patients with glaucoma.</p>                                                                                                                                                                                                                                                                                                                                                                                                                                                                                                                                                                        | <p>2. Are prostaglandin analog eye-drops effective in lowering IOP in patients with POAG?</p> <p>3. Are beta-adrenergic antagonist eye-drops effective in lowering IOP in patients with POAG?</p>                                                                                                                        |
| <p>Agents less frequently used include alpha<sub>2</sub> adrenergic agonists, topical and oral carbonic anhydrase inhibitors, and parasympathomimetics.</p>                                                                                                                                                                                                                                                                                                                                                                                                                                                                                                                                                                    | <p>4. Are alpha<sub>2</sub> adrenergic agonist eye-drops effective in lowering IOP in patients with POAG?</p> <p>5. Are topical and oral carbonic anhydrase inhibitors effective in lowering IOP in patients with POAG?</p> <p>6. Are parasympathomimetic eye-drops effective in lowering IOP in patients with POAG?</p> |
| <p>To determine the effectiveness of topical therapy, it is necessary to distinguish between the therapeutic impact of an agent on IOP and ordinary background fluctuations of IOP.</p> <p>It may be useful to begin by treating only eye and comparing the relative change of the IOP in the two eyes at follow-up visits.</p> <p>However, because the two eyes of an individual may not respond equally to the same medication, and because of the possibility of asymmetric spontaneous fluctuations and the potential for contralateral effect monocular topical medications,<sup>143</sup> it is an acceptable alternative to compare the effect in one eye relative to multiple baseline measurements.<sup>144</sup></p> | <p>8. Is treating one eye initially, and comparing it to the other initially untreated eye, a useful way of determining the pressure lowering efficacy of a topical ocular hypotensive agent?</p>                                                                                                                        |
| <p>If a drug fails to reduce IOP, it should be replaced with an alternative agent until effective medical treatment is established.<sup>[A:III]</sup></p> <p>If a single medication is effective in lowering IOP but the target pressure is not reached, combination therapy or switching to an alternative therapy may be appropriate.</p> <p>The patient and the ophthalmologist may decide that it is impractical or impossible to use multiple medicines simultaneously and then it is important to consider alternative approaches (see subsections on surgical procedures).</p>                                                                                                                                          | <p>7. Is combination medication effective in lowering IOP in patients with POAG?</p>                                                                                                                                                                                                                                     |
| <p>The ophthalmologist should discuss the benefits and risks of medical treatment with the patient.<sup>[B:III]</sup></p>                                                                                                                                                                                                                                                                                                                                                                                                                                                                                                                                                                                                      | <p>10. Does discussion of the benefits and harms of medical treatment with patients affect patient satisfaction?</p>                                                                                                                                                                                                     |
| <p>The ophthalmologist should assess the patient who is being treated with glaucoma medication for local and systemic side effects, toxicity, and possible interactions with other medications.<sup>[A:III]</sup></p> <p>The ophthalmologist must be prepared to recognize potential life-threatening adverse reactions.<sup>[A:III]</sup></p>                                                                                                                                                                                                                                                                                                                                                                                 | <p>11. Does routine assessment help reduce systemic side effects, toxicity, and possible interactions of glaucoma medication?</p>                                                                                                                                                                                        |
| <p>To reduce systemic absorption, patient should be educated about eyelid closure or nasolacrimal occlusion when applying topical medications.<sup>145 [B:II]</sup></p>                                                                                                                                                                                                                                                                                                                                                                                                                                                                                                                                                        | <p>12. Does patient education about eyelid closure or nasolacrimal occlusion help reduce systemic absorption when applying topical medications?</p>                                                                                                                                                                      |
| <p>Adequate treatment of glaucoma requires a high level of adherence to therapy.</p> <p>Frequently this is not achieved; studies indicate relatively poor adherence to therapy in one-third or more of patients, depending on the medications used.<sup>146, 147</sup></p> <p>Repeated instruction in proper techniques for using medication may improve adherence to therapy.<sup>145,148,149</sup></p>                                                                                                                                                                                                                                                                                                                       | <p>13. Are interventions (e.g., repeated instruction, patient education) effective for improving adherence to medical therapy and efficacy of medical therapy in patients with POAG?</p>                                                                                                                                 |

| Statements in the 2005 AAO POAG PPP (ordered as in PPP) *                                                                                                                                                                                                                                                                                                                                                                                                                                                                                                                                                                                                                                                                                                                                                                                                                                                         | Restated clinical questions and question number                                                                                                                                                                                                                                                                                                                                                                      |
|-------------------------------------------------------------------------------------------------------------------------------------------------------------------------------------------------------------------------------------------------------------------------------------------------------------------------------------------------------------------------------------------------------------------------------------------------------------------------------------------------------------------------------------------------------------------------------------------------------------------------------------------------------------------------------------------------------------------------------------------------------------------------------------------------------------------------------------------------------------------------------------------------------------------|----------------------------------------------------------------------------------------------------------------------------------------------------------------------------------------------------------------------------------------------------------------------------------------------------------------------------------------------------------------------------------------------------------------------|
| <p>At each examination, medication dosage and frequency of use should be recorded.</p> <p>Adherence to the therapeutic regimen and the patient's responses to recommendations for therapeutic alternatives or diagnostic procedures should be discussed.<sup>[A:III]</sup></p> <p>Cost may be a factor in adherence, especially when multiple medications are used.<sup>149</sup></p> <p>Patient education and informed participation in treatment decisions may improve adherence<sup>149</sup> and overall effectiveness of glaucoma management.</p>                                                                                                                                                                                                                                                                                                                                                            |                                                                                                                                                                                                                                                                                                                                                                                                                      |
| <p>Laser trabeculoplasty is an appropriate initial therapeutic alternative.<sup>56 [A:I]</sup></p> <p>Laser trabeculoplasty increases aqueous outflow and provides a clinically significant reduction of IOP in more than 75% of initial treatments of previously unoperated eyes.<sup>56,58</sup></p>                                                                                                                                                                                                                                                                                                                                                                                                                                                                                                                                                                                                            | <p><b>14.</b> Is laser trabeculoplasty an effective initial treatment in lowering IOP in patients with POAG?</p>                                                                                                                                                                                                                                                                                                     |
| <p>Selective laser trabeculoplasty is a form of pulsed green laser anterior-chamber angle treatment that, in the short term, appears to be as effective as other trabeculoplasty techniques in lowering IOP.<sup>150</sup></p>                                                                                                                                                                                                                                                                                                                                                                                                                                                                                                                                                                                                                                                                                    | <p><b>15.</b> What is the relative effectiveness of selective laser trabeculoplasty compared with other trabeculoplasty techniques in lowering IOP in patients with POAG?</p>                                                                                                                                                                                                                                        |
| <p>Laser trabeculectomy is an alternative for patients who cannot or will not use medications reliably due to cost, memory problems, difficulty with instillation, or intolerance to the medication.</p>                                                                                                                                                                                                                                                                                                                                                                                                                                                                                                                                                                                                                                                                                                          | <p><b>16.</b> Is laser trabeculectomy effective in patients with POAG who cannot or will not use medications reliably?</p>                                                                                                                                                                                                                                                                                           |
| <p>The amount of medical treatment required for glaucoma is occasionally reduced after trabeculoplasty.<sup>58</sup></p>                                                                                                                                                                                                                                                                                                                                                                                                                                                                                                                                                                                                                                                                                                                                                                                          | <p><b>17.</b> Is laser trabeculoplasty effective in reducing the amount of medical treatment required in patients with POAG?</p>                                                                                                                                                                                                                                                                                     |
| <p>Results from long-term studies indicate that 30% to more than 50% of eyes require additional surgical treatment within 5 years after laser trabeculoplasty.<sup>58,151-154</sup></p> <p>For eyes that have failed to maintain a previously adequate response, repeat laser trabeculoplasty has a low long-term rate of success, with failure occurring in nearly 90% of these eyes by 2 years.<sup>155-159</sup></p> <p>After previous applications to the full circumference of the anterior-chamber angle, repeat laser trabeculoplasty is almost never successful in eyes that have not had a reduction in IOP for at least a year following the first laser surgery.<sup>158</sup></p> <p>Compared with initial laser trabeculoplasty, there is an increased risk after repeat laser trabeculoplasty of problems and complications, such as IOP spikes.<sup>155,156,159,160</sup></p>                      | <p><b>18.</b> Is repeat laser trabeculoplasty effective and safe in lowering IOP in patients with POAG who have not responded adequately to the first laser surgery?</p>                                                                                                                                                                                                                                             |
| <p>The ophthalmologist who performs the surgery must ensure that the patient receives adequate postoperative care.<sup>161 [A:III]</sup></p> <p>The plan for care prior to and after laser trabeculoplasty should include the following elements:<sup>161 [A:III]</sup></p> <ul style="list-style-type: none"> <li><input type="checkbox"/> At least one preoperative evaluation and IOP measurement by the surgeon.<sup>161 [A:III]</sup></li> <li><input type="checkbox"/> Informed consent prior to surgery.<sup>162,163 [A:III]</sup> (Ethical or legal statement)<sup>164 [A:I]</sup></li> <li><input type="checkbox"/> At least one IOP check within 30 to 120 minutes of surgery.</li> <li><input type="checkbox"/> A follow-up examination within 6 weeks of surgery or sooner if there is concern about IOP-related damage to the optic nerve during this time.<sup>151,165-167 [A:III]</sup></li> </ul> | <p><b>19.</b> Does preoperative care (e.g., preoperative evaluation, IOP measurement, informed consent) result in better outcomes in patients scheduled to undergo laser trabeculoplasty?</p> <p><b>20.</b> Does postoperative care (e.g., IOP check within 30-120 minutes of surgery, follow-up examination within 6 weeks of surgery) result in better outcomes in patients who undergo laser trabeculoplasty?</p> |
| <p>Medications that are not being used chronically may be used perioperatively to avert temporary IOP elevations, particularly in those patients with severe disease.<sup>164,168,169</sup></p>                                                                                                                                                                                                                                                                                                                                                                                                                                                                                                                                                                                                                                                                                                                   | <p><b>21.</b> Are perioperative medications (not being used chronically) effective in preventing temporary IOP elevations in patients who undergo laser trabeculoplasty?</p>                                                                                                                                                                                                                                         |
| <p>Filtering surgery is effective at lowering IOP and may sometimes be an appropriate initial therapeutic alternative instead of medications or laser trabeculoplasty.<sup>44,45,139,140 [A:I]</sup></p> <p>Filtering surgery provides an alternative path for the escape of aqueous humor, and it often reduces IOP and the need for medical treatment.</p> <p>The best estimate of the failure rate of filtering surgery alone or combined with medical therapy in a previously unoperated eye comes from the Advanced Glaucoma Intervention Study.<sup>58</sup></p> <p>The 10-year results indicate about 30% failure in African American patients and 20% failure in Caucasian American patients.<sup>58</sup></p>                                                                                                                                                                                            | <p><b>22.</b> Is filtering surgery an effective and safe (initial) treatment in lowering the IOP in patients with POAG?</p>                                                                                                                                                                                                                                                                                          |

| Statements in the 2005 AAO POAG PPP (ordered as in PPP)*                                                                                                                                                                                                                                                                                                                                                                                                                                                                                                                                                                                                                                                                                                                                                                                                                                                                                                                                                                                                                                                                                                                                                                                                                                                          | Restated clinical questions and question number                                                                                                                                                                                                                                                                                                                                                                                                                                                                                                 |
|-------------------------------------------------------------------------------------------------------------------------------------------------------------------------------------------------------------------------------------------------------------------------------------------------------------------------------------------------------------------------------------------------------------------------------------------------------------------------------------------------------------------------------------------------------------------------------------------------------------------------------------------------------------------------------------------------------------------------------------------------------------------------------------------------------------------------------------------------------------------------------------------------------------------------------------------------------------------------------------------------------------------------------------------------------------------------------------------------------------------------------------------------------------------------------------------------------------------------------------------------------------------------------------------------------------------|-------------------------------------------------------------------------------------------------------------------------------------------------------------------------------------------------------------------------------------------------------------------------------------------------------------------------------------------------------------------------------------------------------------------------------------------------------------------------------------------------------------------------------------------------|
| <p>Furthermore, filtering surgery increases the likelihood that phakic eyes will undergo cataract surgery.<sup>105,173,174</sup></p>                                                                                                                                                                                                                                                                                                                                                                                                                                                                                                                                                                                                                                                                                                                                                                                                                                                                                                                                                                                                                                                                                                                                                                              |                                                                                                                                                                                                                                                                                                                                                                                                                                                                                                                                                 |
| <p>While long-term control is often achieved, many patients will require further therapy or a re-operation, which carries a higher failure rate.<sup>58,170-172</sup></p>                                                                                                                                                                                                                                                                                                                                                                                                                                                                                                                                                                                                                                                                                                                                                                                                                                                                                                                                                                                                                                                                                                                                         | <p>23. Are one or more repeat filtering surgeries effective and safe for POAG patients with failed response to an initial filtering procedure?</p>                                                                                                                                                                                                                                                                                                                                                                                              |
| <p>In eyes that have undergone previous cataract surgery involving the conjunctiva, the success rate of initial glaucoma surgery is reduced.<sup>57</sup></p>                                                                                                                                                                                                                                                                                                                                                                                                                                                                                                                                                                                                                                                                                                                                                                                                                                                                                                                                                                                                                                                                                                                                                     | <p>24. Is filtering surgery effective in eyes that have undergone previous cataract surgery involving the conjunctiva?</p>                                                                                                                                                                                                                                                                                                                                                                                                                      |
| <p>Antifibrotic agents may be used intraoperatively and postoperatively to reduce the subconjunctival scarring after filtration surgery that can result in failure of the operation.</p> <p>The use of intraoperative mitomycin C reduces the risk of surgical failure both in eyes at high risk of surgical failure and in eyes that have not undergone previous surgery.<sup>175,176</sup></p> <p>Some studies have demonstrated a benefit of intraoperative 5-fluorouracil<sup>176-179</sup> and others have not.<sup>180,181</sup> and others have not.<sup>182</sup></p> <p>The use of postoperative injections of 5-fluorouracil also reduces the likelihood of surgical failure in both high-risk eyes<sup>57,183-185</sup> and eyes that have not undergone previous surgery.<sup>185-187</sup></p> <p>The use of an antifibrotic agent carries with it an increased likelihood of bleb-related complications such as hypotony,<sup>188-190</sup> hypotony maculopathy,<sup>188</sup> late-onset bleb leak,<sup>185,191</sup> and late-onset infection<sup>192,193</sup> that must be weighed against the benefits when deciding whether or not to use these agents.</p> <p>These complications may be even more common in primary filtering surgery of phakic patients.<sup>194-196</sup></p>            | <p>25. Is intraoperative mitomycin C effective and safe in improving the success rate of primary and repeat filtering surgery?</p> <p>26. Is intraoperative 5-fluorouracil effective and safe in improving the success rate of primary and repeat filtering surgery?</p> <p>27. Is postoperative mitomycin C effective and safe in improving the success rate of primary and repeat filtering surgery?</p> <p>28. Is postoperative 5-fluorouracil effective and safe in improving the success rate of primary and repeat filtering surgery?</p> |
| <p>Nonpenetrating glaucoma surgery is being used as an alternative to trabeculectomy in selected patients by some surgeons. (Not a recommendation)</p> <p>The two main types of nonpenetrating glaucoma surgery are viscocanalostomy and nonpenetrating deep sclerectomy. (Not a recommendation)</p> <p>The rationale for nonpenetrating glaucoma surgery is that by avoiding a continuous passageway from the anterior chamber to the subconjunctival space, the incidence of bleb-related problems and hypotony can be reduced.</p> <p>The nonpenetrating procedures have a higher degree of surgical difficulty compared with trabeculectomy and require special instrumentation. (Not a recommendation)</p> <p>Randomized clinical trials comparing viscocanalostomy with trabeculectomy generally suggest both greater IOP reduction and more complications with trabeculectomy than with viscocanalostomy.<sup>197-201</sup></p> <p>One randomized clinical trial found that trabeculectomy was more effective than nonpenetrating deep sclerectomy at lowering IOP,<sup>202</sup> and one found that the two surgeries were equally effective.<sup>203</sup></p> <p>The precise role of nonpenetrating surgery in the surgical management of glaucoma remains to be determined. (Not a recommendation)</p> | <p>29. Is viscocanalostomy effective in lowering IOP in patients with POAG?</p> <p>30. Is nonpenetrating deep sclerectomy effective and safe in lowering IOP in patients with POAG?</p> <p>31. What is the relative effectiveness of viscocanalostomy compared with trabeculectomy in lowering IOP in patients with POAG?</p> <p>32. What is the relative effectiveness of nonpenetrating deep sclerectomy compared with trabeculectomy in lowering IOP in patients with POAG?</p>                                                              |
| <p>The use of drainage devices (such as those described by Molteno,<sup>204</sup> Ahmed,<sup>205</sup> Krupin,<sup>206</sup> Baerveldt,<sup>207</sup> and others) is generally reserved for patients who have failed filtering surgery with antimetabolites or for patients whose conjunctiva is so scarred from previous surgery that filtering surgery with antimetabolites is at high risk for failure.</p>                                                                                                                                                                                                                                                                                                                                                                                                                                                                                                                                                                                                                                                                                                                                                                                                                                                                                                    | <p>33. Is use of drainage devices effective and safe in management of POAG among patients with failed filtering surgery/scarred conjunctiva/poor prognosis of filtration surgery?</p>                                                                                                                                                                                                                                                                                                                                                           |
| <p>Patients who require filtration surgery and who also have cataract may benefit from simultaneous cataract and glaucoma surgery, as may glaucoma patients with a visually significant cataract and severe, but well-controlled, glaucoma.</p> <p>Generally, combined cataract and glaucoma surgery is not as effective as glaucoma surgery alone in lowering intraocular pressure,<sup>208,209</sup> so patients who require filtration surgery who also have mild cataract may be better served by filtration surgery alone and cataract surgery later.<sup>[B:III]</sup></p>                                                                                                                                                                                                                                                                                                                                                                                                                                                                                                                                                                                                                                                                                                                                  | <p>34. Is sequential filtration and cataract surgery more effective than combined procedures in lowering IOP in patients with POAG and cataract?</p>                                                                                                                                                                                                                                                                                                                                                                                            |
| <p>The use of mitomycin C, but not 5-fluorouracil, results in lower IOP in combined procedures.<sup>176,208,209</sup></p>                                                                                                                                                                                                                                                                                                                                                                                                                                                                                                                                                                                                                                                                                                                                                                                                                                                                                                                                                                                                                                                                                                                                                                                         | <p>35. Is mitomycin C effective in lowering IOP in combined glaucoma and cataract procedures?</p>                                                                                                                                                                                                                                                                                                                                                                                                                                               |

| Statements in the 2005 AAO POAG PPP (ordered as in PPP)*                                                                                                                                                                                                                                                                                                                                                                                                                                                                                                                                                                                                                                                                                                                                                                                                                                                                                                                                                                                                                                                                                                                                                                                                                                                                                                                                                                                                                                                                                                                                                                                                                                                                                                                                                                                                                                                                                                                                                                        | Restated clinical questions and question number                                                                                                                                                                                                                                                                                                                                                                                                                                                                                                              |
|---------------------------------------------------------------------------------------------------------------------------------------------------------------------------------------------------------------------------------------------------------------------------------------------------------------------------------------------------------------------------------------------------------------------------------------------------------------------------------------------------------------------------------------------------------------------------------------------------------------------------------------------------------------------------------------------------------------------------------------------------------------------------------------------------------------------------------------------------------------------------------------------------------------------------------------------------------------------------------------------------------------------------------------------------------------------------------------------------------------------------------------------------------------------------------------------------------------------------------------------------------------------------------------------------------------------------------------------------------------------------------------------------------------------------------------------------------------------------------------------------------------------------------------------------------------------------------------------------------------------------------------------------------------------------------------------------------------------------------------------------------------------------------------------------------------------------------------------------------------------------------------------------------------------------------------------------------------------------------------------------------------------------------|--------------------------------------------------------------------------------------------------------------------------------------------------------------------------------------------------------------------------------------------------------------------------------------------------------------------------------------------------------------------------------------------------------------------------------------------------------------------------------------------------------------------------------------------------------------|
| <p>Separating the cataract and glaucoma incisions results in lower IOP than a one-site combined procedure, but the differences in outcomes are small.<sup>208,209</sup></p>                                                                                                                                                                                                                                                                                                                                                                                                                                                                                                                                                                                                                                                                                                                                                                                                                                                                                                                                                                                                                                                                                                                                                                                                                                                                                                                                                                                                                                                                                                                                                                                                                                                                                                                                                                                                                                                     | <p><b>36.</b> Are combined glaucoma and cataract procedures with separate incisions more effective than a one-site incision?</p>                                                                                                                                                                                                                                                                                                                                                                                                                             |
| <p>Cataract surgery alone sometimes results in a modest reduction of IOP.<sup>210</sup></p>                                                                                                                                                                                                                                                                                                                                                                                                                                                                                                                                                                                                                                                                                                                                                                                                                                                                                                                                                                                                                                                                                                                                                                                                                                                                                                                                                                                                                                                                                                                                                                                                                                                                                                                                                                                                                                                                                                                                     | <p><b>37.</b> Is cataract surgery alone effective in lowering IOP in patients with POAG and cataract?</p>                                                                                                                                                                                                                                                                                                                                                                                                                                                    |
| <p>The plan for care before filtering surgery should include the following elements:</p> <ul style="list-style-type: none"> <li><input type="checkbox"/> At least one preoperative evaluation by the surgeon.<sup>161 [A:III]</sup></li> <li><input type="checkbox"/> Informed consent prior to surgery.<sup>163 [A:III]</sup> (Ethical or legal statement)</li> </ul>                                                                                                                                                                                                                                                                                                                                                                                                                                                                                                                                                                                                                                                                                                                                                                                                                                                                                                                                                                                                                                                                                                                                                                                                                                                                                                                                                                                                                                                                                                                                                                                                                                                          | <p><b>38.</b> Does preoperative care (e.g., preoperative evaluation, informed consent) by the surgeon result in better outcomes in patients scheduled to undergo filtering surgery?</p>                                                                                                                                                                                                                                                                                                                                                                      |
| <ul style="list-style-type: none"> <li><input type="checkbox"/> The ophthalmologist who performs the surgery must ensure that the patient receives adequate postoperative care, which includes the following:<sup>161 [A:III]</sup> <ul style="list-style-type: none"> <li><input type="checkbox"/> Use of topical corticosteroids in the postoperative period, unless contraindicated.<sup>211,212 [A:II]</sup></li> <li><input type="checkbox"/> Follow-up evaluation on the first postoperative day (12 to 36 hours after surgery) by the surgeon and at least once from the second to the tenth postoperative day to evaluate visual acuity, IOP, and status of the anterior segment.<sup>213-218 [A:II]</sup></li> <li><input type="checkbox"/> In the absence of complications, additional postoperative visits during a 6-week period to evaluate visual acuity, IOP, and status of the anterior segment.<sup>213-218 [A:III]</sup></li> </ul> </li> <li><input type="checkbox"/> More frequent follow-up visits, as necessary, for patients with postoperative complications such as a flat or shallow anterior chamber or evidence of early bleb failure, increased inflammation, or Tenon's cyst formation.<sup>213-218 [A:III]</sup></li> <li><input type="checkbox"/> Additional treatments as necessary, including surgical procedures to correct a flat anterior chamber, repair bleb leaks, perform bleb massage, perform suture lysis, or perform bleb needling or other surgical revisions of the bleb to maximize the chances for a successful long-term result.<sup>[A:III]</sup></li> <li><input type="checkbox"/> A discussion between the surgeon and the patient to explain that filtration surgery places the eye at risk for endophthalmitis for the duration of the patient's life, and that the patient must regard the symptoms of pain and decreased vision and the signs of redness and discharge as a medical emergency that requires medical attention. (Ethical or legal statement)</li> </ul> | <p><b>39.</b> Does postoperative care (e.g., topical corticosteroids, bleb leaks repair, bleb massage, suture lysis, etc) result in better outcomes in patients who undergo filtering surgery?</p> <p><b>40.</b> Does the use of topical corticosteroids in the postoperative period improve patient outcomes?</p> <p><b>41.</b> Do additional surgical procedures such as flat anterior chamber correction, bleb leaks repair, bleb massage, suture lysis, and bleb needling improve the long-term result for patients who undergone filtering surgery?</p> |
| <p>Cyclodestructive procedures reduce the rate of aqueous production. In recent years, cyclodestructive procedures are more commonly performed using a transscleral laser delivery system but they can also be performed endoscopically.<sup>219</sup> (Not a recommendation)</p> <p>Because cyclodestructive procedures have been associated with subsequent decrease of visual acuity,<sup>220,221</sup> and, rarely, cases of sympathetic ophthalmia,<sup>222,223</sup> they are often reserved for eyes with reduced visual acuity and patients who are poor candidates for incisional surgery.</p> <p>A small case series with follow-up of at least 13 months showed good preservation of visual acuity in most eyes after laser cyclophotocoagulation.<sup>224</sup></p> <p>Disadvantages of cyclodestructive procedures include postoperative inflammation and the necessity for additional steps of treatment weeks or months later.<sup>225</sup></p> <p>Cyclodestructive procedures have advantages over filtration surgery that include technical ease, rapid recovery, reduced postoperative care, and reduced likelihood of the complications of bleeding and infection.</p> <p>The advantages and disadvantages of a cyclodestructive procedure compared with a filtration operation or a tube shunt procedure should be discussed with patients who are poor surgical candidates, have limited visual potential, or have</p>                                                                                                                                                                                                                                                                                                                                                                                                                                                                                                                                                                                    | <p><b>42.</b> Are cyclodestructive procedures effective and safe in the treatment of POAG patients who are poor incisional surgical candidate, have limited visual potential, or have undergone multiple previous glaucoma operations?</p>                                                                                                                                                                                                                                                                                                                   |

| Statements in the 2005 AAO POAG PPP (ordered as in PPP)*                                                                                                                                                                                                                                                                                                                                                                                                                                                                                                                                                                                                                                                                                                                                                                                                                                                                                                                                                                                                                                                                                                                                                                                                                                                                                                                                                                                                                                                                                                                                                                                                                                                                                                                                                                                                                                                                                                                                                                                                                                           | Restated clinical questions and question number                                                                                                                                                                                                                                                                                                                                                                                                                                                                                                   |
|----------------------------------------------------------------------------------------------------------------------------------------------------------------------------------------------------------------------------------------------------------------------------------------------------------------------------------------------------------------------------------------------------------------------------------------------------------------------------------------------------------------------------------------------------------------------------------------------------------------------------------------------------------------------------------------------------------------------------------------------------------------------------------------------------------------------------------------------------------------------------------------------------------------------------------------------------------------------------------------------------------------------------------------------------------------------------------------------------------------------------------------------------------------------------------------------------------------------------------------------------------------------------------------------------------------------------------------------------------------------------------------------------------------------------------------------------------------------------------------------------------------------------------------------------------------------------------------------------------------------------------------------------------------------------------------------------------------------------------------------------------------------------------------------------------------------------------------------------------------------------------------------------------------------------------------------------------------------------------------------------------------------------------------------------------------------------------------------------|---------------------------------------------------------------------------------------------------------------------------------------------------------------------------------------------------------------------------------------------------------------------------------------------------------------------------------------------------------------------------------------------------------------------------------------------------------------------------------------------------------------------------------------------------|
| <p>undergone multiple previous glaucoma operations.<sup>[A:III]</sup> (Ethical or legal statement)</p>                                                                                                                                                                                                                                                                                                                                                                                                                                                                                                                                                                                                                                                                                                                                                                                                                                                                                                                                                                                                                                                                                                                                                                                                                                                                                                                                                                                                                                                                                                                                                                                                                                                                                                                                                                                                                                                                                                                                                                                             |                                                                                                                                                                                                                                                                                                                                                                                                                                                                                                                                                   |
| <p>The indications for adjusting therapy are as follows:<sup>[A:III]</sup></p> <ul style="list-style-type: none"> <li><input type="checkbox"/> Target IOP is not achieved.</li> <li><input type="checkbox"/> A patient has progressive optic nerve damage despite achieving the target IOP. The validity of the diagnosis and target pressure should be reassessed.<sup>[A:III]</sup> Additional evaluation may reveal conditions that are contributing to the progression of damage and serving as a justification to escalate therapy. These evaluations include obtaining diurnal IOP measurements, repeating the central corneal thickness measurement to verify a thin cornea or a change in corneal thickness after refractive surgery, or seeking evidence of unrecognized low ocular perfusion pressure.<sup>10</sup> A neurologic evaluation also may be considered.</li> <li><input type="checkbox"/> Patient is intolerant of the prescribed medical regimen. (Ethical or legal statement)</li> <li><input type="checkbox"/> Patient does not adhere to the prescribed medical regimen. (Ethical or legal statement)</li> <li><input type="checkbox"/> Contraindications to individual medicines develop. (Ethical or legal statement)</li> <li><input type="checkbox"/> Stable optic nerve status and low IOP occurs for a prolonged period in a patient on pressure-lowering medications. Under these circumstances, a carefully monitored attempt to reduce the medical regimen may be appropriate. Downward adjustment of target pressure should be made in the face of progressive optic disc or visual field change.<sup>232, 233 [A:III]</sup> Upward adjustment of target pressure should be considered if the patient has been stable and if the patient either requires (because of side effects) or desires less medication.<sup>[B:III]</sup> The ophthalmologist should plan a follow-up visit in 2 to 8 weeks to assess the response and side effects from washout of the old medication or onset of maximum effect of the new medication.<sup>[A:III]''</sup></li> </ul> | <p><b>43.</b> Do the recommended indications (i.e., target IOP not achieved, etc.) for adjusting therapy improve outcomes in patient with POAG?</p> <p><b>44.</b> In patients with stable optic nerve status and low IOP, is discontinuation of medication (or upward adjustment of IOP) effective and safe in terms of disease progression?</p> <p><b>45.</b> What is the optimal interval for follow-up visit to assess the response and side effects from washout of the old medication and onset of maximum effect of the new medication?</p> |

\* Statements, including the reference number, ratings of importance and ratings of strength of evidence, are reproduced with permission from the American Academy of Ophthalmology Glaucoma Panel. Preferred Practice Pattern® Guidelines. Primary Open-Angle Glaucoma. San Francisco, CA: American Academy of Ophthalmology; 2005.

The ratings of importance are divided into three levels:

- Level A, most important
- Level B, moderately important
- Level C, relevant but not critical

The ratings of strength of evidence are divided into three levels:

- Level I: evidence obtained from at least one properly conducted, well-designed randomized controlled trial, or meta-analyses of randomized controlled trials.
- Level II: evidence obtained from well-designed controlled trials without randomization; well-designed cohort or case-control analytic studies, preferably from more than one center, or multiple-time series with or without the intervention.
- Level III: evidence obtained from descriptive studies, case reports, or reports of expert committees/organizations (e.g., PPP panel consensus with external peer review).

- AAO American Academy of Ophthalmology
- POAG Primary Open Angle Glaucoma
- PPPs Preferred Practice Patterns
- IOP Intraocular Pressure

### References cited in the guidelines:

10. Tielsch JM, Katz J, Sommer A, et al. Hypertension, perfusion pressure, and primary open-angle glaucoma. A population-based assessment. *Arch Ophthalmol* 1995;113:216-21.
44. Jay JL, Allan D. The benefit of early trabeculectomy versus conventional management in primary open angle glaucoma relative to severity of disease. *Eye* 1989;3 (Pt 5):528-35.
45. Migdal C, Gregory W, Hitchings R. Long-term functional outcome after early surgery compared with laser and medicine in open-angle glaucoma. *Ophthalmology* 1994;101:1651-6; discussion 7.
56. The Glaucoma Laser Trial (GLT) and Glaucoma Laser Trial Follow-up Study: 7. Results. Glaucoma Laser Trial Research Group. *Am J Ophthalmol* 1995;120:718-31.
57. Five-year follow-up of the Fluorouracil Filtering Surgery Study. The Fluorouracil Filtering Surgery Study Group. *Am J Ophthalmol* 1996;121:349-66.
58. The advanced glaucoma intervention study (AGIS); 13. Comparison of treatment outcomes within race: 10-year results. *Ophthalmology* 2004;111:651-64.
105. Lichter PR, Musch DC, Gillespie BW, et al. Interim clinical outcomes in the Collaborative Initial Glaucoma Treatment Study comparing initial treatment randomized to medications or surgery. *Ophthalmology* 2001;108:1943-53.
139. Fiscella RG, Green A, Patuszynski DH, Wilensky J. Medical therapy cost considerations for glaucoma. *Am J Ophthalmol* 2003;136:18-25.
140. Jampel HD. Target pressure in glaucoma therapy. *J Glaucoma* 1997;6:133-8.
144. Realini T, Fechtner RD, Atreides SP, Gollance S. The uniocular drug trial and second-eye response to glaucoma medications. *Ophthalmology* 2004;111:421-6.
145. Zimmerman TJ, Kooner KS, Kandarakis AS, Ziegler LP. Improving the therapeutic index of topically applied ocular drugs. *Arch Ophthalmol* 1984;102:551-3.
146. Kass MA, Gordon M, Morley RE, Jr., et al. Compliance with topical timolol treatment. *Am J Ophthalmol* 1987;103:188-93.
147. Kass MA, Meltzer DW, Gordon M, et al. Compliance with topical pilocarpine treatment. *Am J Ophthalmol* 1986;101:515-23.
148. Haynes R, McDonald H, Garg A, Montague P. Interventions for helping patients to follow prescriptions for medications (Cochrane Review). Chichester: John Wiley & Sons, Ltd., 2003; 48.
149. Osterberg L, Blaschke T. Adherence to medication. *N Engl J Med* 2005;353:487-97.
150. Damji KF, Shah KC, Rock WJ, et al. Selective laser trabeculoplasty v argon laser trabeculoplasty: a prospective randomised clinical trial. *Br J Ophthalmol* 1999;83:718-22.
151. Spaeth GL, Baez KA. Argon laser trabeculoplasty controls one third of cases of progressive, uncontrolled, open angle glaucoma for 5 years. *Arch Ophthalmol* 1992;110:491-4.
152. Schwartz AL, Love DC, Schwartz MA. Long-term follow-up of argon laser trabeculoplasty for uncontrolled open-angle glaucoma. *Arch Ophthalmol* 1985;103:1482-4.
153. Krupin T, Patkin R, Kurata FK, et al. Argon laser trabeculoplasty in black and white patients with primary open-angle glaucoma. *Ophthalmology* 1986;93:811-6.

154. Shingleton BJ, Richter CU, Dharma SK, et al. Long-term efficacy of argon laser trabeculoplasty. A 10-year follow-up study. *Ophthalmology* 1993;100:1324-9.
155. Starita RJ, Fellman RL, Spaeth GL, Poryzees E. The effect of repeating full-circumference argon laser trabeculoplasty. *Ophthalmic Surg* 1984;15:41-3.
156. Brown SV, Thomas JV, Simmons RJ. Laser trabeculoplasty re-treatment. *Am J Ophthalmol* 1985;99:8-10.
157. Richter CU, Shingleton BJ, Bellows AR, et al. Retreatment with argon laser trabeculoplasty. *Ophthalmology* 1987;94:1085-9.
158. Weber PA, Burton GD, Epitropoulos AT. Laser trabeculoplasty retreatment. *Ophthalmic Surg* 1989;20:702-6.
159. Feldman RM, Katz LJ, Spaeth GL, et al. Long-term efficacy of repeat argon laser trabeculoplasty. *Ophthalmology* 1991;98:1061-5.
160. Jorizzo PA, Samples JR, Van Buskirk EM. The effect of repeat argon laser trabeculoplasty. *Am J Ophthalmol* 1988;106:682-5.
161. American Academy of Ophthalmology. An Ophthalmologist's Duties Concerning Postoperative Care, Policy Statement. San Francisco: American Academy of Ophthalmology, 2003. Available at: [www.aao.org/member/policy/index.cfm](http://www.aao.org/member/policy/index.cfm).
162. Spaeth G, Katz J, Terebuh AK. Glaucoma Surgery. In: Tasman W, Jaeger EA, eds. *Duane's Clinical Ophthalmology*. Philadelphia: JB Lippincott Co., 1999.
163. Jonsen A, Siegler M, Winslade W. *Clinical Ethics: a practical approach to ethical decisions in clinical medicine*. 3rd ed. Summit, PA: McGraw-Hill, Inc., Health Professions Division, 1992; 40-3.
164. Robin AL. Argon laser trabeculoplasty medical therapy to prevent the intraocular pressure rise associated with argon laser trabeculoplasty. *Ophthalmic Surg* 1991;22:31-7.
165. Wickham MG, Worthen DM. Argon laser trabeculotomy: long-term follow-up. *Ophthalmology* 1979;86:495-503.
166. Wise JB, Witter SL. Argon laser therapy for open-angle glaucoma. A pilot study. *Arch Ophthalmol* 1979;97:319-22.
167. Schwartz AL, Whitten ME, Bleiman B, Martin D. Argon laser trabecular surgery in uncontrolled phakic open angle glaucoma. *Ophthalmology* 1981;88:203-12.
168. Holmwood PC, Chase RD, Krupin T, et al. Apraclonidine and argon laser trabeculoplasty. *Am J Ophthalmol* 1992;114:19-22.
169. Robin A, Pollack I, House B, Enger C. Effects of ALO 2145 on intraocular pressure following argon laser trabeculectomy. *Arch Ophthalmol* 1987;105:646-50.
170. Heuer DK, Gressel MG, Parrish RK, 2nd, et al. Trabeculectomy in aphakic eyes. *Ophthalmology* 1984;91:1045-51.
171. Gross RL, Feldman RM, Spaeth GL, et al. Surgical therapy of chronic glaucoma in aphakia and pseudophakia. *Ophthalmology* 1988;95:1195-201.
172. Shirato S, Kitazawa Y, Mishima S. A critical analysis of the trabeculectomy results by a prospective follow-up design. *Jpn J Ophthalmol* 1982;26:468-80.
173. The Advanced Glaucoma Intervention Study: 8. Risk of cataract formation after trabeculectomy. *Arch Ophthalmol* 2001;119:1771-9.
174. Hylton C, Congdon N, Friedman D, et al. Cataract after glaucoma filtration surgery. *Am J Ophthalmol* 2003;135:231-2.
175. Andreanos D, Georgopoulos GT, Vergados J, et al. Clinical evaluation of the effect of mitomycin-C in re-operation for primary open angle glaucoma. *Eur J Ophthalmol* 1997;7:49-54.
176. Wilkins M, Indar A, Wormald R. Intra-operative mitomycin C for glaucoma surgery. *Cochrane Database Syst Rev* 2001:CD002897.

177. Robin AL, Ramakrishnan R, Krishnadas R, et al. A long-term dose-response study of mitomycin in glaucoma filtration surgery. *Arch Ophthalmol* 1997;115:969-74.
178. Costa VP, Comegno PE, Vasconcelos JP, et al. Low-dose mitomycin C trabeculectomy in patients with advanced glaucoma. *J Glaucoma* 1996;5:193-9.
179. Martini E, Laffi GL, Sprovieri C, Scorolli L. Low-dosage mitomycin C as an adjunct to trabeculectomy. A prospective controlled study. *Eur J Ophthalmol* 1997;7:40-8.
180. WuDunn D, Cantor LB, Palanca-Capistrano AM, et al. A prospective randomized trial comparing intraoperative 5-fluorouracil vs mitomycin C in primary trabeculectomy. *Am J Ophthalmol* 2002;134:521-8.
181. Singh K, Mehta K, Shaikh N. Trabeculectomy with intraoperative mitomycin C versus 5-fluorouracil. Prospective randomized clinical trial. *Ophthalmology* 2000;107:2305-9.
182. Leyland M, Bloom P, Zinicola E, et al. Single intraoperative application of 5-Fluorouracil versus placebo in low-risk trabeculectomy surgery: a randomized trial. *J Glaucoma* 2001;10:452-7.
183. Ruderman JM, Welch DB, Smith MF, Shoch DE. A randomized study of 5-fluorouracil and filtration surgery. *Am J Ophthalmol* 1987;104:218-24.
184. Fluorouracil Filtering Surgery Study one-year follow-up. The Fluorouracil Filtering Surgery Study Group. *Am J Ophthalmol* 1989;108:625-35.
185. Wormald R, Wilkins MR, Bunce C. Post-operative 5-Fluorouracil for glaucoma surgery. *Cochrane Database Syst Rev* 2001:CD001132.
186. Goldenfeld M, Krupin T, Ruderman JM, et al. 5-Fluorouracil in initial trabeculectomy. A prospective, randomized, multicenter study. *Ophthalmology* 1994;101:1024-9.
187. Ophir A, Ticho U. A randomized study of trabeculectomy and subconjunctival administration of fluorouracil in primary glaucomas. *Arch Ophthalmol* 1992;110:1072-5.
188. Costa VP, Wilson RP, Moster MR, et al. Hypotony maculopathy following the use of topical mitomycin C in glaucoma filtration surgery. *Ophthalmic Surg* 1993;24:389-94.
189. Zacharia PT, Deppermann SR, Schuman JS. Ocular hypotony after trabeculectomy with mitomycin C. *Am J Ophthalmol* 1993;116:314-26.
190. Kupin TH, Juzych MS, Shin DH, et al. Adjunctive mitomycin C in primary trabeculectomy in phakic eyes. *Am J Ophthalmol* 1995;119:30-9.
191. Greenfield DS, Liebmann JM, Jee J, Ritch R. Late-onset bleb leaks after glaucoma filtering surgery. *Arch Ophthalmol* 1998;116:443-7.
192. Soltau JB, Rothman RF, Budenz DL, et al. Risk factors for glaucoma filtering bleb infections. *Arch Ophthalmol* 2000;118:338-42.
193. Jampel HD, Quigley HA, Kerrigan-Baumrind LA, et al. Risk factors for late-onset infection following glaucoma filtration surgery. *Arch Ophthalmol* 2001;119:1001-8.
194. Whiteside-Michel J, Liebmann JM, Ritch R. Initial 5-fluorouracil trabeculectomy in young patients. *Ophthalmology* 1992;99:7-13.
195. Suner IJ, Greenfield DS, Miller MP, et al. Hypotony maculopathy after filtering surgery with mitomycin C. Incidence and treatment. *Ophthalmology* 1997;104:207-14; discussion 14-5.
196. Scott DR, Quigley HA. Medical management of a high bleb phase after trabeculectomies. *Ophthalmology* 1988;95:1169-73.
197. Carassa RG, Bettin P, Fiori M, Brancato R. Viscocanalostomy versus trabeculectomy in white adults affected by open-angle glaucoma: a 2-year randomized, controlled trial. *Ophthalmology* 2003;110:882-7.



198. Kobayashi H, Kobayashi K, Okinami S. A comparison of the intraocular pressure-lowering effect and safety of viscocanalostomy and trabeculectomy with mitomycin C in bilateral open-angle glaucoma. *Graefes Arch Clin Exp Ophthalmol* 2003;241:359-66.
199. Luke C, Dietlein TS, Jacobi PC, et al. A prospective randomized trial of viscocanalostomy versus trabeculectomy in open-angle glaucoma: a 1-year follow-up study. *J Glaucoma* 2002;11:294-9.
200. O'Brart DP, Rowlands E, Islam N, Noury AM. A randomised, prospective study comparing trabeculectomy augmented with antimetabolites with a viscocanalostomy technique for the management of open angle glaucoma uncontrolled by medical therapy. *Br J Ophthalmol* 2002;86:748-54.
201. Jonescu-Cuyppers C, Jacobi P, Konen W, Krieglstein G. Primary viscocanalostomy versus trabeculectomy in white patients with open-angle glaucoma: A randomized clinical trial. *Ophthalmology* 2001;108:254-8.
202. Chiselita D. Non-penetrating deep sclerectomy versus trabeculectomy in primary open-angle glaucoma surgery. *Eye* 2001;15:197-201.
203. El Sayyad F, Helal M, El-Kholify H, et al. Nonpenetrating deep sclerectomy versus trabeculectomy in bilateral primary open-angle glaucoma. *Ophthalmology* 2000;107:1671-4.
204. Mills RP, Reynolds A, Emond MJ, et al. Long-term survival of Molteno glaucoma drainage devices. *Ophthalmology* 1996;103:299-305.
205. Coleman AL, Hill R, Wilson MR, et al. Initial clinical experience with the Ahmed Glaucoma Valve implant. *Am J Ophthalmol* 1995;120:23-31.
206. Fellenbaum PS, Almeida AR, Minckler DS, et al. Krupin disk implantation for complicated glaucomas. *Ophthalmology* 1994;101:1178-82.
207. Siegner SW, Netland PA, Urban RC, Jr., et al. Clinical experience with the Baerveldt glaucoma drainage implant. *Ophthalmology* 1995;102:1298-307.
208. Friedman DS, Jampel HD, Lubomski LH, et al. Surgical strategies for coexisting glaucoma and cataract: an evidence-based update. *Ophthalmology* 2002;109:1902-13.
209. Jampel HD, Friedman DS, Lubomski LH, et al. Effect of technique on intraocular pressure after combined cataract and glaucoma surgery: An evidence-based review. *Ophthalmology* 2002;109:2215-24; quiz 25, 31.
210. Hayashi K, Hayashi H, Nakao F, Hayashi F. Effect of cataract surgery on intraocular pressure control in glaucoma patients. *J Cataract Refract Surg* 2001;27:1779-86.
211. Roth SM, Spaeth GL, Starita RJ, et al. The effects of postoperative corticosteroids on trabeculectomy and the clinical course of glaucoma: five-year follow-up study. *Ophthalmic Surg* 1991;22:724-9.
212. Starita RJ, Fellman RL, Spaeth GL, et al. Short- and long-term effects of postoperative corticosteroids on trabeculectomy. *Ophthalmology* 1985;92:938-46.
213. Stewart WC, Shields MB. Management of anterior chamber depth after trabeculectomy. *Am J Ophthalmol* 1988;106:41-4.
214. Fiore PM, Richter CU, Arzeno G, et al. The effect of anterior chamber depth on endothelial cell count after filtration surgery. *Arch Ophthalmol* 1989;107:1609-11.
215. Phillips CI, Clark CV, Levy AM. Posterior synechiae after glaucoma operations: aggravation by shallow anterior chamber and pilocarpine. *Br J Ophthalmol* 1987;71:428-32.
216. Brubaker RF, Pederson JE. Ciliochoroidal detachment. *Surv Ophthalmol* 1983;27:281-9.
217. Gressel MG, Parrish RK, 2nd, Heuer DK. Delayed nonexpulsive suprachoroidal hemorrhage. *Arch Ophthalmol* 1984;102:1757-60.

218. Ruderman JM, Harbin TS, Jr., Campbell DG. Postoperative suprachoroidal hemorrhage following filtration procedures. *Arch Ophthalmol* 1986;104:201-5.
219. Pastor SA, Singh K, Lee DA, et al. Cyclophotocoagulation: a report by the American Academy of Ophthalmology. *Ophthalmology* 2001;108:2130-8.
220. Kosoko O, Gaasterland DE, Pollack IP, Enger CL. Long-term outcome of initial ciliary ablation with contact diode laser transscleral cyclophotocoagulation for severe glaucoma. The Diode Laser Ciliary Ablation Study Group. *Ophthalmology* 1996;103:1294-302.
221. Youn J, Cox TA, Allingham RR, Shields MB. Factors associated with visual acuity loss after noncontact transscleral Nd:YAG cyclophotocoagulation. *J Glaucoma* 1996;5:390-4.
222. Fankhauser F, Kwasniewska S, Van der Zypen E. Cyclodestructive procedures. I. Clinical and morphological aspects: a review. *Ophthalmologica* 2004;218:77-95.
223. Bechrakis NE, Muller-Stolzenburg NW, Helbig H, Foerster MH. Sympathetic ophthalmia following laser cyclocoagulation. *Arch Ophthalmol* 1994;112:80-4.
224. Wilensky JT, Kammer J. Long-term visual outcome of transscleral laser cyclotherapy in eyes with ambulatory vision. *Ophthalmology* 2004;111:1389-92.
225. Bloom PA, Tsai JC, Sharma K, et al. "Cyclodiode". Trans-scleral diode laser cyclophotocoagulation in the treatment of advanced refractory glaucoma. *Ophthalmology* 1997;104:1508-19; discussion 19-20.
232. Vogel R, Crick RP, Mills KB, et al. Effect of timolol versus pilocarpine on visual field progression in patients with primary open-angle glaucoma. *Ophthalmology* 1992;99:1505-11.
233. Stewart WC, Chorak RP, Hunt HH, Sethuraman G. Factors associated with visual loss in patients with advanced glaucomatous changes in the optic nerve head. *Am J Ophthalmol* 1993;116:176-81.
